# Supplementary material for: A strategy for rapid and facile fabrication of controlled, layered blood vessel-like structures
Source: Royal Society of Chemistry journal article supplement (doi:10.1039/c6ra12768a), 2016-01-01
Supplement: c6ra12768a1.pdf [file c6ra12768a1.pdf]

Supporting Information File

**A strategy for rapid and facile fabrication of controlled, layered  
blood vessel-like structures**

Nuoxin Wang<sup>a,b</sup>, Lixue Tang<sup>b</sup>, Wenfu Zheng<sup>b</sup>, Yunhu Peng<sup>b</sup>, Shiyu Cheng<sup>b</sup>, Yifeng Lei<sup>b</sup>,  
Lingmin Zhang<sup>b</sup>, Bingfeng Hu<sup>b</sup>, Shaoqin Liu<sup>a,\*</sup>, Wei Zhang<sup>b,\*</sup> and Xingyu Jiang<sup>a,b,\*</sup>

<sup>a</sup> School of Life Science and Technology, Harbin Institute of Technology, 2 Yikuang Road,  
Nangang District, Harbin 150001, China

<sup>b</sup> Beijing Engineering Research Center for BioNanotechnology&CAS Key Laboratory for  
Biological Effects of Nanomaterials and Nanosafety, CAS Center for Excellence in  
Nanoscience, National Center for NanoScience and Technology, 11 Beiyitiao, Zhongguancun,  
Haidian District, Beijing 100190, China

**\*Corresponding authors:** shaoqiuliu@hit.edu.cn (S. Q. L.), zhangw@nanocr.cn (W.  
Z.), xingyujiang@nanocr.cn (X. Y. J.)

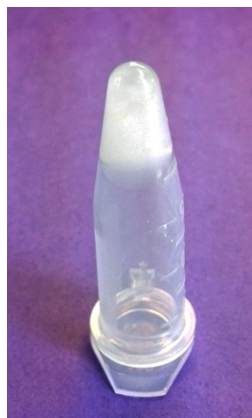

**Figure S1** The fibrin gel forms after mixing its two components within seconds under ambient conditions. In ten tests, the gel forms within 5 seconds with excellent reproducibility.

The three pathways that makeup the classical blood coagulation pathway

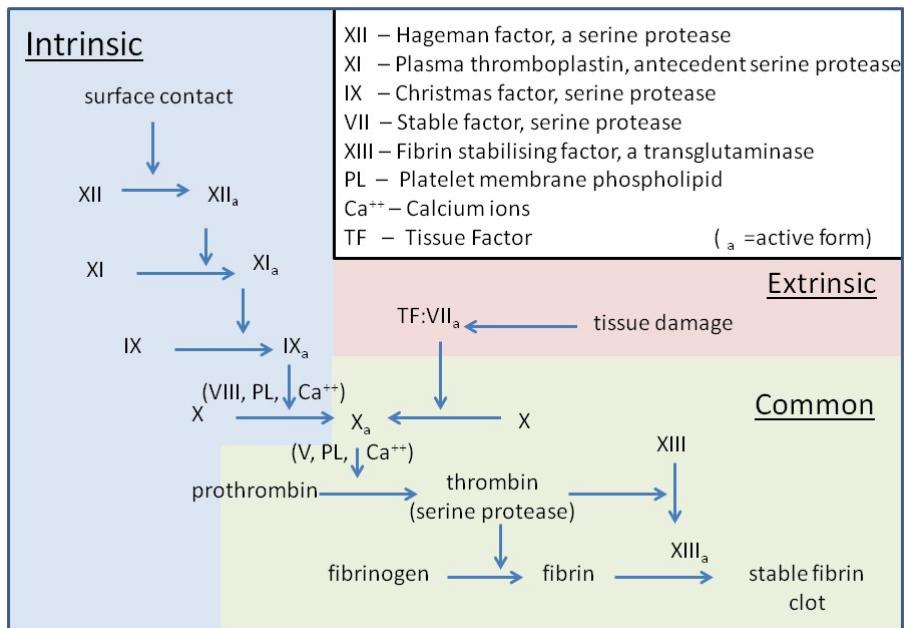

**Figure S2** The classical blood coagulation pathway. The common stage (the light green part) illustrates the central role of thrombin in fibrin clot formation. Source: [https://en.wikipedia.org/wiki/Coagulation#/media/File:Classical\\_blood\\_coagulation\\_pathway.png](https://en.wikipedia.org/wiki/Coagulation#/media/File:Classical_blood_coagulation_pathway.png), which is based on the information in ref.[1].

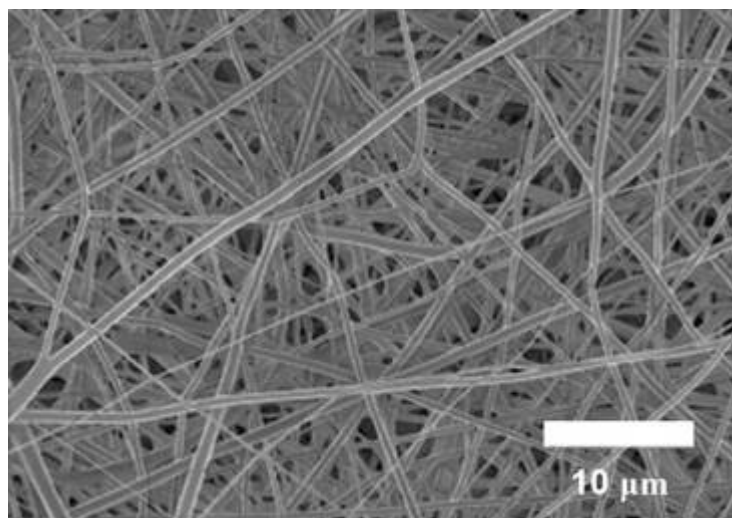

**Figure S3** SEM imaging of PLGA electrospun film

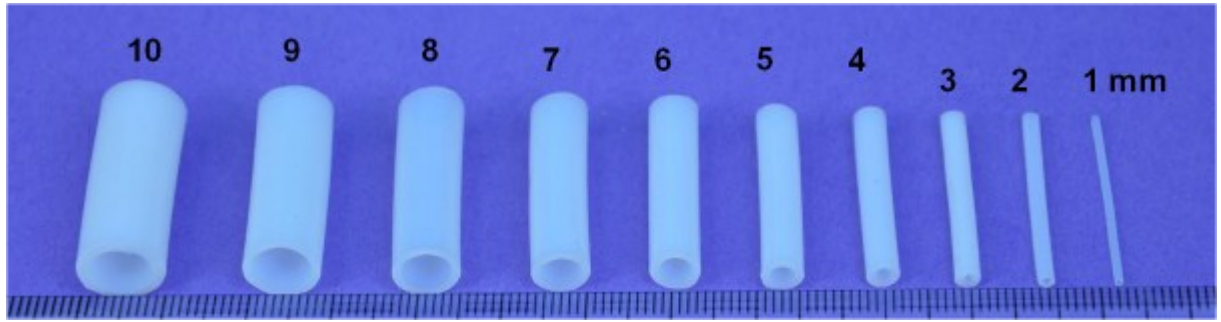

**Figure S4** ePTFE mandrels with different outer diameters.

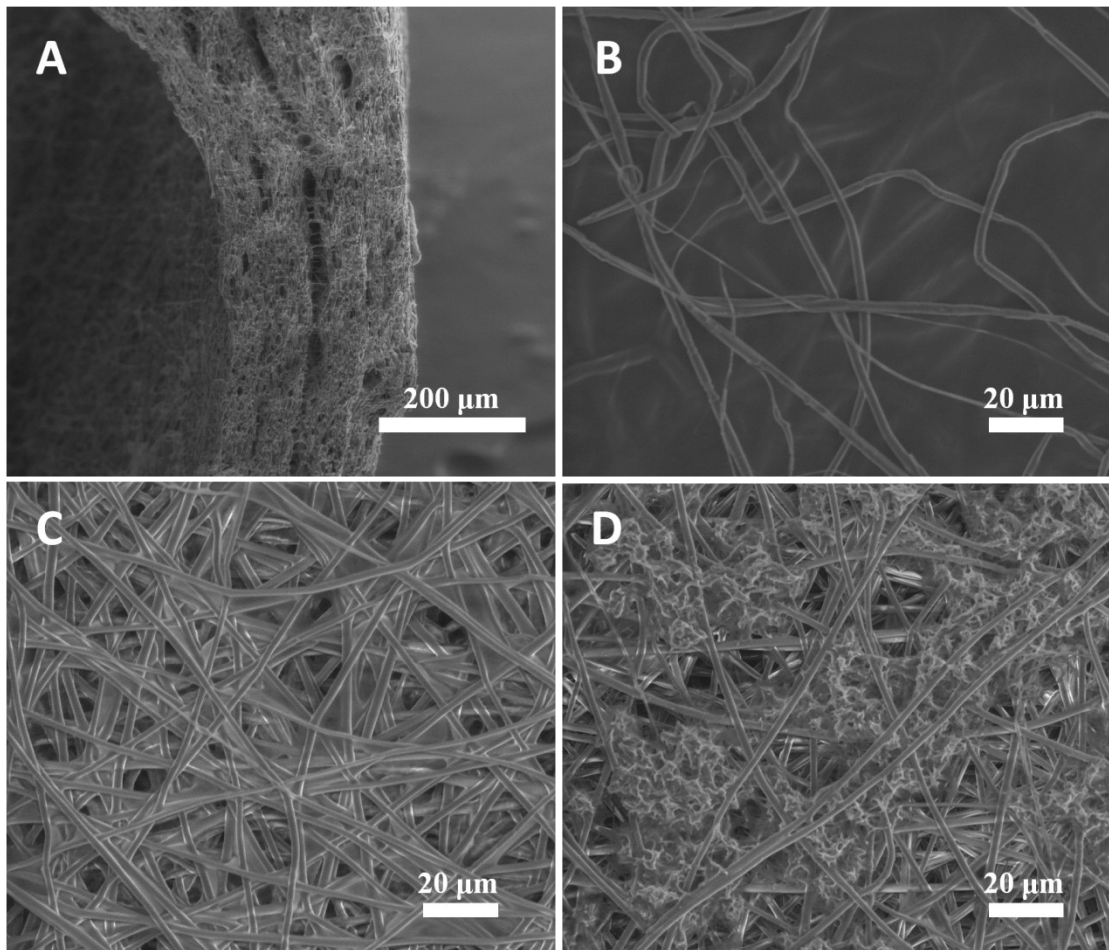

**Figure S5** The microstructure of the glue. (A) The fibrin glue fibers between the interfacial layers. (B) The fibrin glue fibers on PLGA scaffold film surface. (C) The component A on PLGA scaffold film surface. (D) The component B on PLGA scaffold film surface.

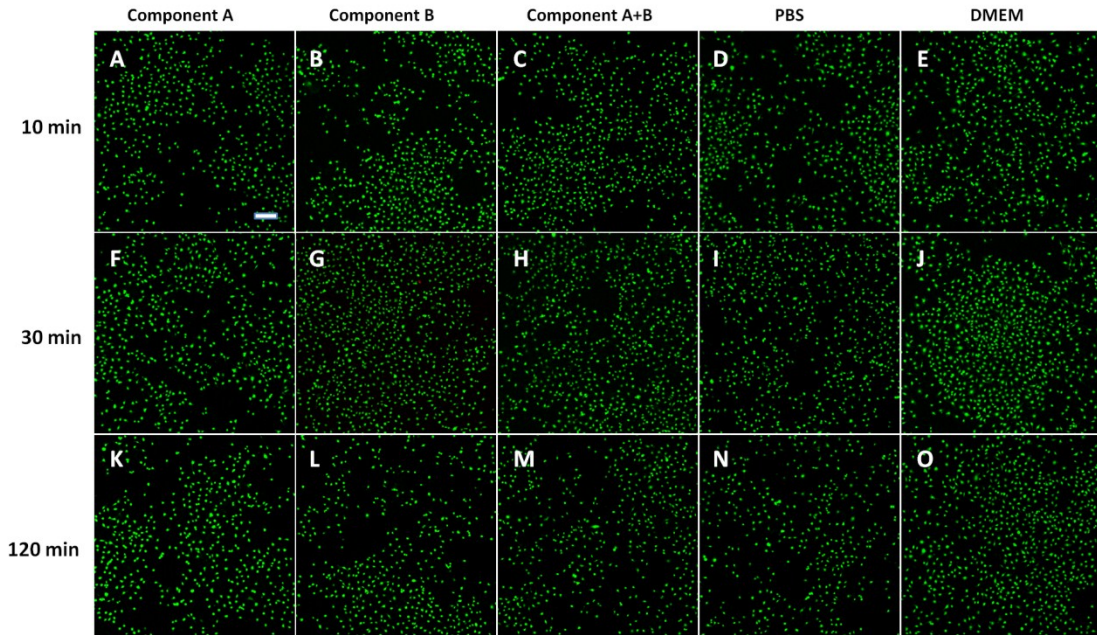

**Figure S6** The effect of fibrin glue components dissolved in PBS (20% v/v) on HUVECs viability. A~E) 10-min treatment by component A of the glue (A), component B of the glue (B), mixture of component A and B (C), PBS (D), and DMEM (E), under ambient condition, respectively. F~J) 30-min treatment by component A of the glue (F), component B of the glue (G), mixture of component A and B (H), PBS (I), and DMEM (J), under ambient condition, respectively. K~O) 120-min treatment by component A of the glue (K), component B of the glue (L), mixture of component A and B (M), PBS (N), and DMEM (O), under ambient condition, respectively. The results illustrate that the viability of cells in different conditions has no significant differences. Green: live cells, Red: dead cells. Scale bar=50  $\mu\text{m}$ .



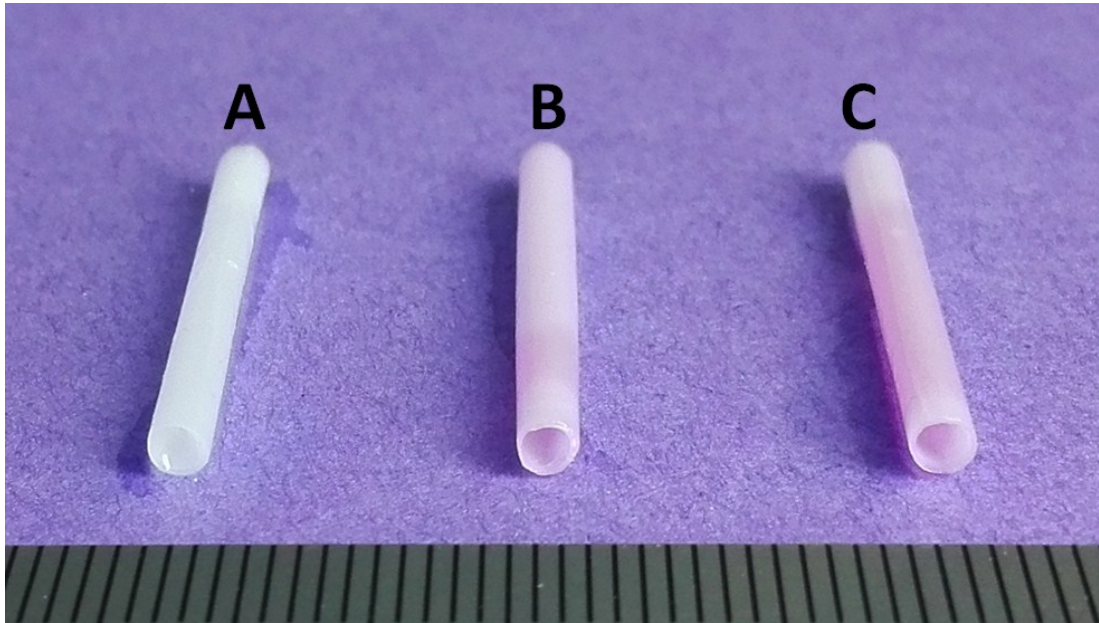

**Figure S7** (A, B) The cell-free scaffolds after 3-d treatment in PBS (A) and DMEM (B) at 37°C. (C) The cell-seeded scaffold after 3-d treatment in cell culture incubator at 37°C, 5%CO<sub>2</sub>. The picture illustrates their integrity.

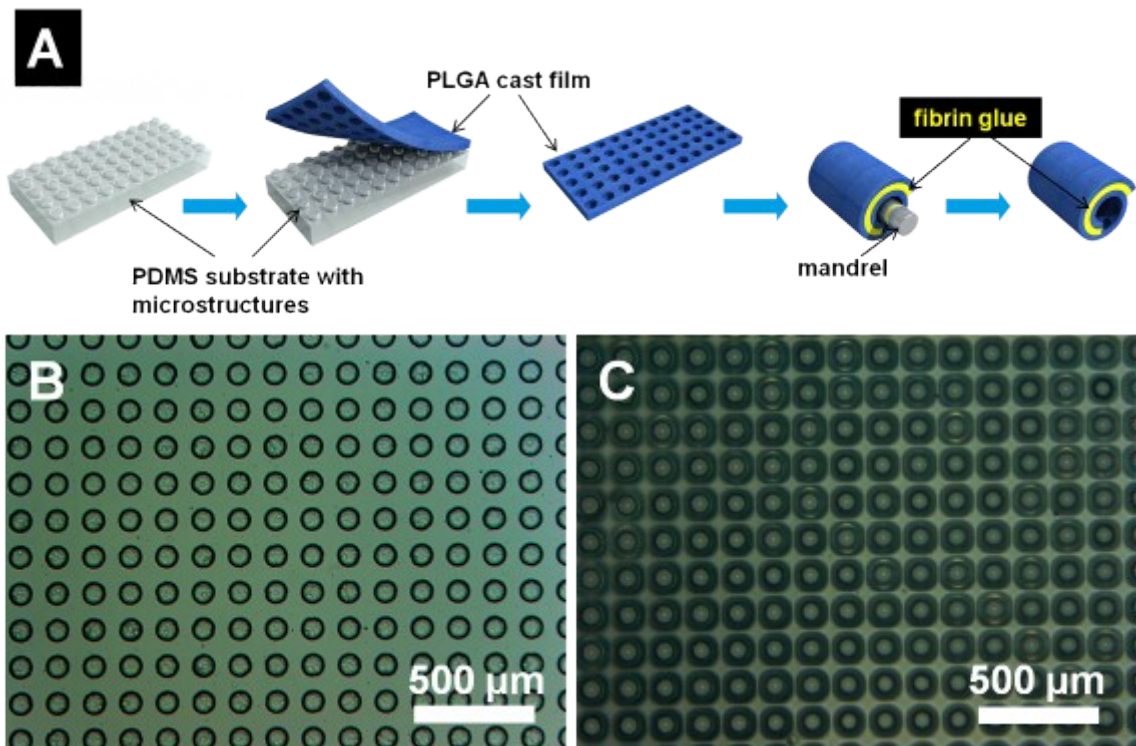

**Figure S8** Fabrication of tubes with microwells. (A) The fabrication process. (B) Optical imaging of the PDMS substrate of the cast film with micropillars. (C) Optical imaging of the PLGA50:50 cast film with microwells complementary to the substrate. The rolled-up tube is shown in **Figure 2G**.

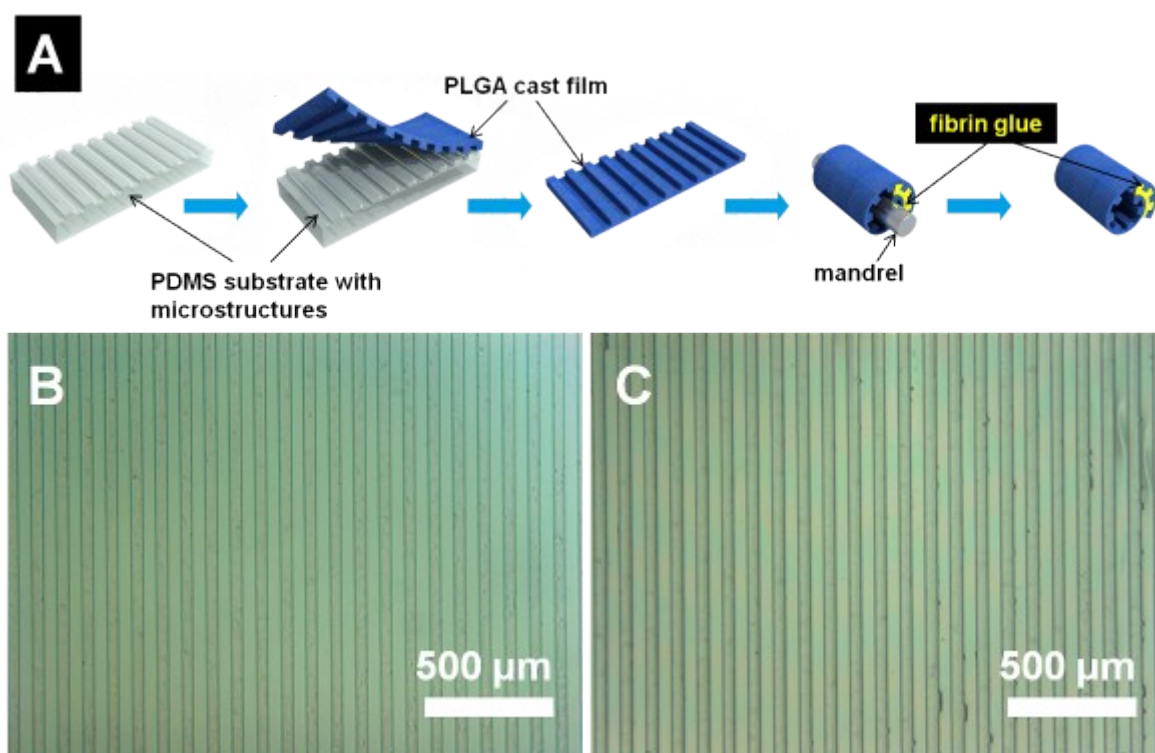

**Figure S9** Fabrication of tubes with microgrooves. (A) The fabrication process. (B) Optical imaging of the PDMS substrate of the cast film with microgrooves. (C) Optical imaging of the PLGA50:50 cast film with microgrooves complementary to the substrate. The rolled-up tube is shown in **Figure 2H**.

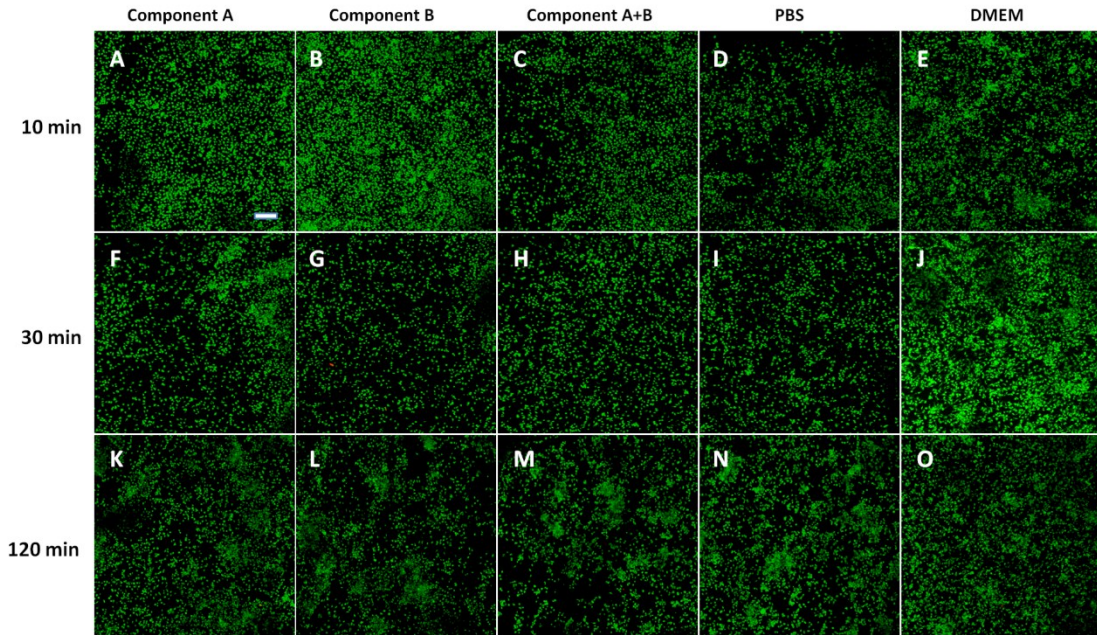

**Figure S10** The effect of fibrin glue components directly coated on cell-seeded PLGA film on HUVECs viability. A~E) 10-min treatment by component A of the glue (A), component B of the glue (B), mixture of component A and B (C), PBS (D), and DMEM (E), under ambient condition, respectively. F~J) 30-min treatment by component A of the glue (F), component B of the glue (G), mixture of component A and B (H), PBS (I), and DMEM (J), under ambient condition, respectively. K~O) 120-min treatment by component A of the glue (K), component B of the glue (L), mixture of component A and B (M), PBS (N), and DMEM (O), under ambient condition, respectively. The results illustrate that the viability of cells in different conditions has no significant differences. Green: live cells, Red: dead cells. Scale bar=50  $\mu\text{m}$ .



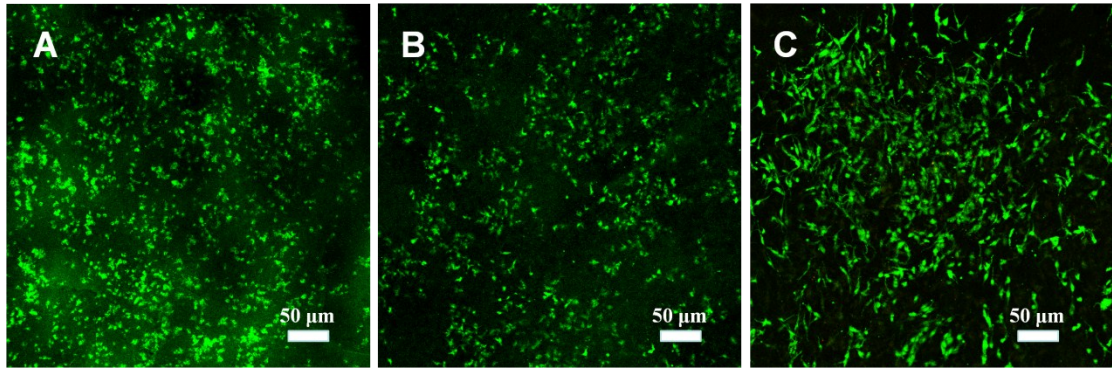

**Figure S11** Cell viability after 3-d culture in a cell culture incubator. (A) HUVEC. (B) HASMC. (C) HAF. Green: live cells, Red: dead cells.

### References

- [1] Pallister CJ and Watson MS (2010). Haematology. Scion Publishing. pp. 336–347. ISBN 1-904842-39-9.
